# Supplementary material for: Epigenetic Response of Yarrowia lipolytica to Stress: Tracking Methylation Level and Search for Methylation Patterns via Whole-Genome Sequencing
Source: MDPI journal article supplement (doi:10.3390/microorganisms9091798), 2021-08-24
Supplement: s1 [file s1]

**S1 Table**

**S1A Table** Details of ANOVA statistical analysis for data collected from repeated batch cultivations. Methylation level in % 5mC was the input variable.

| Effect               | One-dimensional results for each variable. Sigma-restricted parameterization.<br>Decomposition of effective hypotheses |                |               |               |                 |
|----------------------|------------------------------------------------------------------------------------------------------------------------|----------------|---------------|---------------|-----------------|
|                      | Degrees of Freedom                                                                                                     | Methylation    |               |               |                 |
|                      |                                                                                                                        | SS             | MS            | F             | p               |
| <b>Constant Term</b> | 1                                                                                                                      | 307,1237       | 307,1237      | 435,4845      | 0               |
| <b>HS vs control</b> | 1                                                                                                                      | 0,4376         | 0,4376        | 0,6204        | 0,434758        |
| <b>Cycle number</b>  | <b>2</b>                                                                                                               | <b>11,6161</b> | <b>5,8081</b> | <b>8,2355</b> | <b>0,000841</b> |
| Time after HS        | 2                                                                                                                      | 2,614          | 1,307         | 1,8533        | 0,167761        |
| <b>Error</b>         | 48                                                                                                                     | 33,8518        | 0,7052        |               |                 |
| <b>Total</b>         | 53                                                                                                                     | 48,5195        |               |               |                 |

**S1B Table** Details of Tukey multiple comparison test for data collected from repeated batch cultivations. Methylation level in % 5mC was the input variable.

| No | Tukey HSD Test; Variable: Methylation; Approximate probabilities for post hoc tests |          |          |          |  |
|----|-------------------------------------------------------------------------------------|----------|----------|----------|--|
|    | Cycle Number                                                                        | {1}      | {2}      | {3}      |  |
| 1  | 1                                                                                   |          | 0,005678 | 0,001603 |  |
| 2  | 2                                                                                   | 0,005678 |          | 0,895592 |  |
| 3  | 3                                                                                   | 0,001603 | 0,895592 |          |  |
| No | Tukey HSD Test; Variable: Methylation; Approximate probabilities for post hoc tests |          |          |          |  |
|    | Time after HS                                                                       | {1}      | {2}      | {3}      |  |
| 1  | 0                                                                                   |          | 0,255197 | 0,205908 |  |
| 2  | A                                                                                   | 0,255197 |          | 0,991399 |  |
| 3  | B                                                                                   | 0,205908 | 0,991399 |          |  |
| No | Tukey HSD Test; Variable: Methylation; Approximate probabilities for post hoc tests |          |          |          |  |
|    | HS vs C                                                                             | {1}      | {2}      |          |  |
| 1  | C                                                                                   |          | 0,434900 |          |  |
| 2  | HS                                                                                  | 0,434900 |          |          |  |
